# Supplementary material
Source: MDPI journal article supplement (https://www.mdpi.com/2073-4352/7/9/271)
Supplement: s1 [file s1]

## Supplementary information

### Theoretical densities of the single phase materials

Theoretical densities of the single phase materials  $\rho_{theo}$  are calculated to

$$\delta_{theo} = [Z M] / [A V] \quad (S1)$$

( $A$  – Avogadro’s constant,  $M$  – molar mass,  $V$  – unit cell volume,  $Z$  – formula units per unit cell). For the compositions  $x = \{2, 2.72, 2.90, 3\}$  the unit cell volume  $V$  is gained from the lattice parameter refinements in this work, otherwise from literature data (Table 1, main text).

For  $x = 2.90$  we find a discrepancy: The density  $\rho_{theo} = 7.16 \text{ g cm}^{-3}$  is based on *Magnéli’s* model with perfectly undistorted  $[\text{WO}_6]$  octahedra between the CS planes [35]. This represents the least dense packing of the octahedra. Thus, every real structure wherein tilting and distortion occur must yield a density  $\rho_{theo} > 7.16 \text{ g cm}^{-3}$  as observed in previous experimental work [11, 21]. However, we gain a  $\rho_{theo}$  from the PXRD data which is considerably lower than predicted by *Magnéli’s* model. Also none of the published values clearly exceeds the density of the room temperature phases  $\gamma\text{-WO}_3$  ( $7.19 \text{ g cm}^{-3}$ ) and  $\delta\text{-WO}_3$  ( $7.29 \text{ g cm}^{-3}$ ) although the CS planes in  $\text{WO}_{2.90}$  are supposed to result in a distinct compression of the  $\text{WO}_3$  parent structure [42].

**Table S1.** Mass density  $\rho_{theo}$  of tungsten oxides calculated from their molar mass  $M$  and unit cell volume  $V$  (see **Table 1** in main text). The relative mass density  $\rho_{rel}$  is obtained by measuring the density  $\rho_m$ .

| $X$  | $M$<br>g mol <sup>-1</sup> | Phase                                  | $Z$ | $\rho_{theo}$<br>g cm <sup>-3</sup> | $\rho_m$<br>g cm <sup>-3</sup> | $\rho_{rel}$<br>% | Ref.      |
|------|----------------------------|----------------------------------------|-----|-------------------------------------|--------------------------------|-------------------|-----------|
| 2    | 215.84                     | WO <sub>2</sub>                        | 4   | 10.77                               | -                              | -                 | [30]      |
|      |                            |                                        | 4   | 10.78                               | 9.64                           | 89.42             | this work |
| 2.72 | 4093.12                    | W <sub>18</sub> O <sub>49</sub>        | 1   | 7.69                                | n.a.                           | n.a.              | [31]      |
|      |                            |                                        | 1   | 7.71                                | n.a.                           | n.a.              | [32]      |
|      |                            |                                        | 1   | 7.73                                | n.a.                           | n.a.              | [33]      |
|      |                            |                                        | 1   | -                                   | 7.70                           | 100               | [11]      |
|      |                            |                                        | 1   | 7.72                                | 7.49                           | 97.02             | this work |
| 2.90 | 4604.80                    | W <sub>20</sub> O <sub>58</sub>        | 1   | 7.17                                | -                              | -                 | [21]      |
|      |                            |                                        | 1   | 7.16                                | -                              | -                 | [35]      |
|      |                            |                                        | 1   | 7.20                                | 6.95                           | 98                | [11]      |
|      |                            |                                        | 1   | 7.11                                | 7.05                           | 99.12             | this work |
| 2.92 | 5580.16                    | W <sub>25</sub> O <sub>73</sub>        | 2   | 6.88                                | -                              | -                 | [14]      |
| 3    | 231.84                     | $\epsilon\text{-WO}_3$                 | 4   | 7.39                                | -                              | -                 | [43]      |
|      |                            | $\delta\text{-WO}_3$                   | 8   | 7.29                                | -                              | -                 | [44]      |
|      |                            | $\delta\text{-} \& \gamma\text{-WO}_3$ | -   | -                                   | 7.19                           | -                 | this work |
|      |                            | $\gamma\text{-WO}_3$                   | 8   | -                                   | -                              | -                 | this work |
|      |                            | $\gamma\text{-WO}_3$                   | 8   | 7.19                                | -                              | -                 | [36]      |
|      |                            | $\beta\text{-WO}_3$                    | 8   | 7.12                                | -                              | -                 | [36]      |
|      |                            | $\alpha\text{-WO}_3$                   | 8   | 7.03                                | -                              | -                 | [36]      |

### Thermoelectric properties

In **Figure S1a** the electrical conductivities of the known compositions  $x = 2, 2.72$  and  $2.90$  are compared.  $\text{WO}_{2.90}$  shows  $\sigma(T) = 77(4) \cdot 10^3 \text{ S m}^{-1}$  over the whole temperature range and a local maximum at 635 K.  $\text{WO}_2$  and  $\text{WO}_{2.72}$  reveal a metallic behaviour with the typical dependency  $\sigma(T) \propto 1/T$  over a wide temperature range (**Figure S1b**).

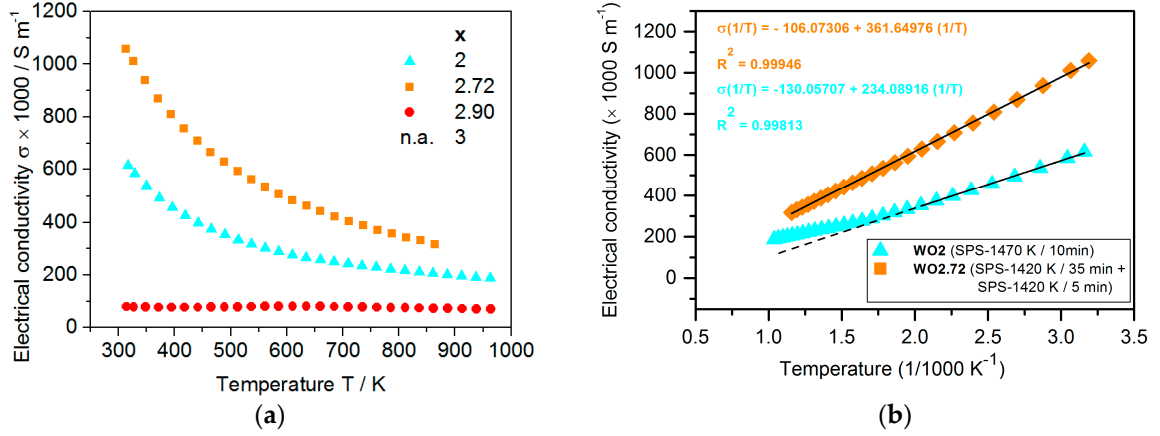

**Figure S1.** (a) Electrical conductivity  $\sigma(T)$  of the reference materials  $\text{WO}_2$ ,  $\text{WO}_{2.72}$  and  $\text{WO}_{2.90}$ . No measurement was possible for  $\text{WO}_3$  due to its insulating character. (b) A linear interpolation (black line) shows the metallic behaviour of  $\text{WO}_2$  and  $\text{WO}_{2.72}$  with  $\sigma(T) \propto 1/T$  dependency. An extrapolation (dashed lines) reveals a deviation from this behaviour for  $\text{WO}_2$  at high temperatures  $T > 500 \text{ K}$ .

As expected due to its semiconducting behaviour  $\text{WO}_{2.90}$  exhibits the highest negative Seebeck coefficient among the known compositions (Figure S2a). Therefore  $\text{WO}_{2.90}$  also shows the highest figure of merit  $ZT$  for temperatures  $> 535 \text{ K}$  whilst for  $T < 535 \text{ K}$  the low electrical conductivity is disadvantageous and  $\text{WO}_{2.72}$  exhibits the higher  $ZT$  (Figure S2b).

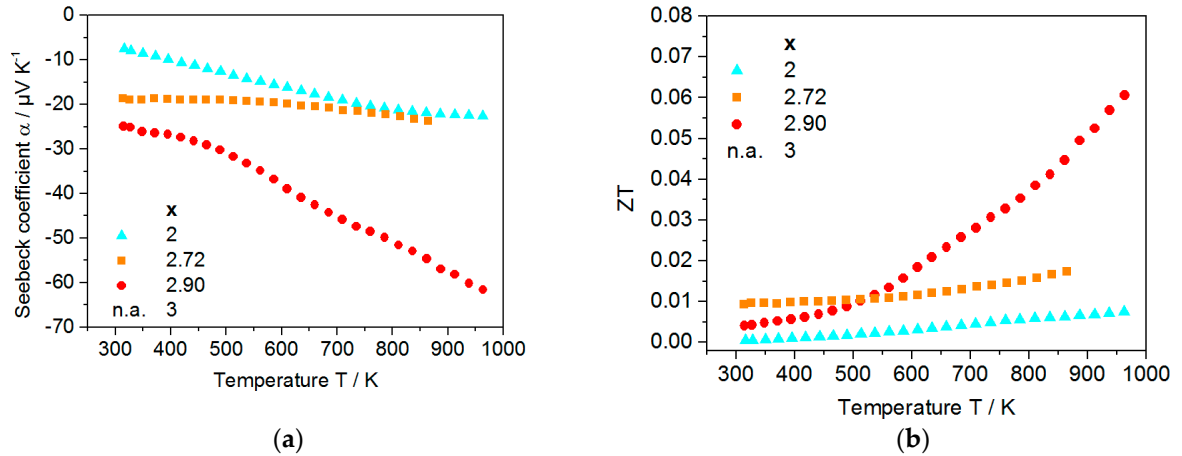

**Figure S2.** (a) Seebeck coefficient  $\alpha(T)$  and (b) the resulting figures of merit  $ZT$  of the reference materials  $\text{WO}_2$ ,  $\text{WO}_{2.72}$  and  $\text{WO}_{2.90}$ . No measurement was possible for  $\text{WO}_3$  due to its insulating character.

### Reference sample $\text{WO}_{2.90}$

In the samples  $\text{WO}_x$  prepared with SPS-1420 K / 10 min we find the phase “ $\text{WO}_{2.82}$ ” for  $2.72 \leq x \leq 2.90$  which might be  $\text{W}_{12}\text{O}_{34}$ . This phase cannot be formed due to SPS-specific effects since it is also observed in  $\text{WO}_{2.90}$  material which was synthesized in an evacuated silica tube for 72 h at 1370 K (Figure S3a).

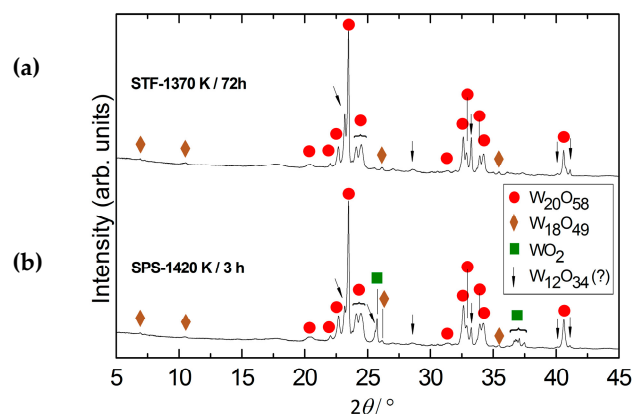

**Figure S3.** PXRD patterns of  $\text{WO}_{2.90}$  obtained (a) from heating in an evacuated silica tube at 1370 K for 72 h and (b) from SPS synthesis at similar temperature for 3 h. Reflections of the new phase “ $\text{WO}_{2.82}$ ” which might be  $\text{W}_{12}\text{O}_{34}$  appear for both routines. Radiation was  $\text{Cu-K}\alpha 1$ .

### $c_p$ measurements of $\text{WO}_x$ materials from differential scanning calorimetry (DSC)

Preliminary  $c_p(T)$  measurements were performed for  $\text{WO}_x$  materials which were synthesized with SPS-1320 K / 10 min. Differences between the measured  $c_p(T)$  values were non-systematic and smaller than the 10 % error of the *DSC 404 C Pegasus* (Netzsch, Selb, Germany) device (**Figure S4**, error bars). Thus, for calculations of the thermoelectric properties of  $\text{WO}_x$  and  $\text{WO}_2$  theoretical values of  $\text{WO}_3$  and  $\text{WO}_2$  from the *NIST-JANAF* database were used respectively (**Figure S4**, dotted lines).

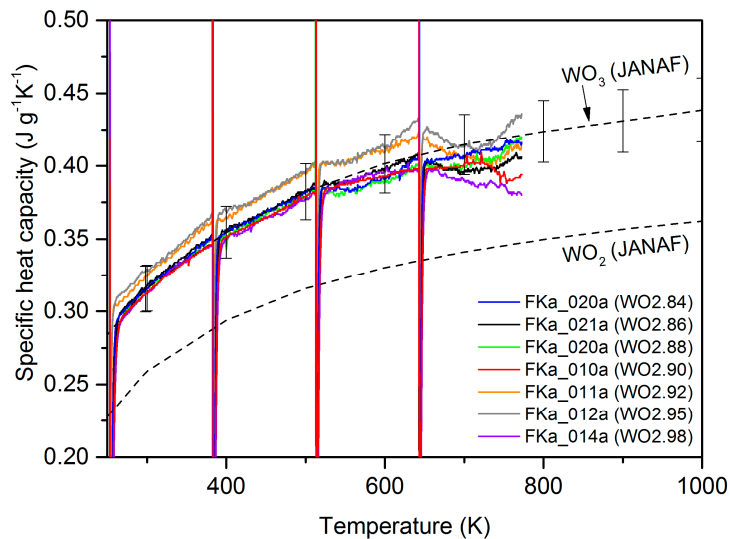

**Figure S4.** Specific heat capacity  $c_p(T)$  of  $\text{WO}_x$  materials show values close to calculations from the *NIST-JANAF* database (dotted lines) and differed by less than 10 % (error bars).
